# Supplementary material for: Determination of Intra- and Extracellular Metabolic Adaptations of 3D Cell Cultures upon Challenges in Real-Time by NMR
Source: MDPI journal article supplement (doi:10.3390/ijms23126555), 2022-06-12
Supplement: s1 [file s1]

## Supplementary Materials

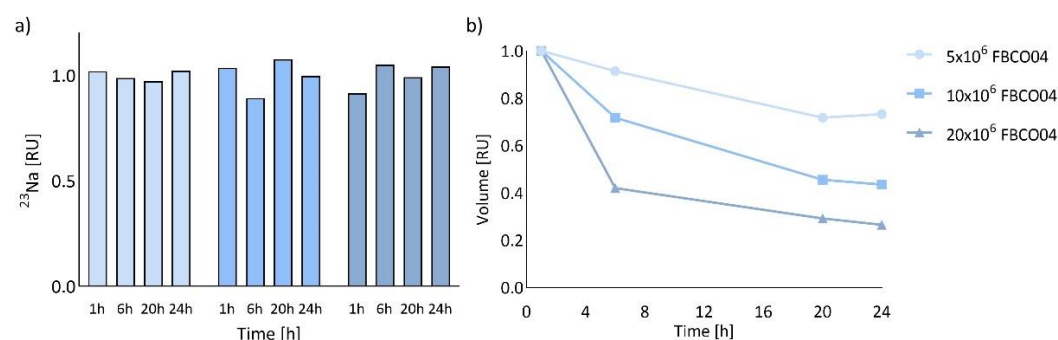

**Figure S1.** (a) Intensity of the  $^{23}\text{Na}$  signal, in the first 24 h after sample realization, of 3D collagen-based matrix embedded 5, 10, and 20 million fibroblasts. Non-significant changes in sodium level revealed fibroblast mediated contraction rather than degradation of 3D collagen-based matrix in cell culture incubator condition before NMR measurements. Relative units (RU) were obtained from the normalization of each measurement to the average of all  $^{23}\text{Na}$  measurements at all time points and for each cell density. (b) Scaffold volume reduction, in the first 24 h after sample realization, of 3D collagen-based matrix embedded 5, 10, and 20 million fibroblasts. As cell density increased, a larger volume contraction was observed. Relative units (RU) were obtained from the normalization to the first value (time point 1 h), for each cell density.

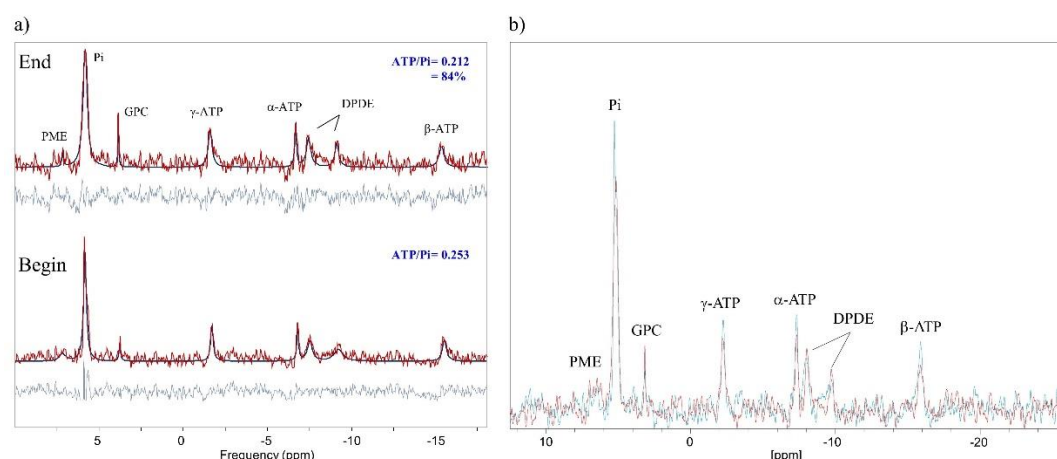

**Figure S2.** (a)  $^{31}\text{P}$  spectra acquired at the beginning and at the end of a full-day experiment fitted with jMRUI [23]. (b) Overlapped  $^{31}\text{P}$  NMR spectra with resonances assignments at the beginning (blue) and at the end (red) of a full-day experiment. ATP levels slightly decrease over the measurement time under standard cell culture conditions.

**Table S1.** Compounds identified in 1D PROJECTED  $^1\text{H}$  NMR spectrum of perfused 3D collagen-based matrix embedded  $10 \times 10^6$  FBCO04, with related chemical shifts (multiplicities) and number of protons per resonance.

| Peak | Compound Name    | $^1\text{H}$ NMR Chemical shift [ppm],<br>Multiplicity | Number of<br>protons |
|------|------------------|--------------------------------------------------------|----------------------|
| 1    | Acetate (Ac)     | 1.928 (s)                                              | 3                    |
| 2    | Alanine (Ala)    | 1.478 (d), 3.791 (q)                                   | 3, 1                 |
| 3    | Arginine (Arg)   | 1.649 (m), 1.894 (m), 3.219 (t),<br>3.389 (t)          | 2, 2, 2, 1           |
| 4    | Asparagine (Asn) | 2.845 (m), 2.929 (m), 3.84 (m)                         | 1, 1, 1              |
| 5    | Aspartate (Asp)  | 2.667 (m), 3.93 (m)                                    | 2, 1                 |

|    |                             |                                                                                    |                     |
|----|-----------------------------|------------------------------------------------------------------------------------|---------------------|
| 6  | Choline (Cho)               | 3.218 (s), 3.53 (m), 4.07 (t)                                                      | 9, 2, 2             |
| 7  | Creatine (Cre)              | 3.04 (s), 3.935 (s)                                                                | 3, 2                |
| 8  | Cysteine (Cys)              | 3.073 (m), 3.70 (s), 3.979 (m)                                                     | 2, 1, 1             |
| 9  | Ethanol (EtOH)              | 1.174 (t), 3.651 (q)                                                               | 3, 2                |
| 10 | Ethanolamine (ETA)          | 3.13 (t), 3.83 (t)                                                                 | 2, 2                |
| 11 | Glycerophosphocholine (GPC) | 3.254 (s)                                                                          | 9                   |
| 12 | Glucose (Glc)               | 3.407 (m), 3.456 (m), 3.527 (dd), 3.738 (m), 3.827 (m), 3.888 (dd), 5.223 (d)      | 1, 1, 1, 3, 3, 2, 1 |
| 13 | Glutamate (Glu)             | 2.095 (m), 2.14 (m), 2.416 (m), 3.769 (m)                                          | 2, 1, 1, 1          |
| 15 | Glutamine (Gln)             | 2.121 (m), 2.442 (m), 3.759 (t)                                                    | 2, 2, 1             |
| 16 | Glutathione (GSH)           | 2.158 (m), 2.541 (q), 2.956 (t), 3.75 (m), 4.585                                   | 2, 2, 2, 3, 1       |
| 17 | Histidine (His)             | 3.16 (q), 3.23 (q), 3.99 (t), 7.06 (s), 7.786 (s)                                  | 1, 1, 1, 1, 1       |
| 18 | Isoleucine (Ile)            | 0.928 (t), 0.997 (d), 1.245 (m), 1.454 (m), 1.968 (m), 3.662 (d)                   | 3, 3, 1, 1, 1, 1    |
| 19 | Lactate (Lac)               | 1.324 (d), 4.104 (q)                                                               | 3, 1                |
| 20 | Leucine (Leu)               | 0.94 (d), 0.95 (d), 1.714 (m), 3.739 (m)                                           | 3, 3, 3, 1          |
| 21 | Lipid (Lip)                 | 0.855, 1.256, 1.56, 5.285                                                          | -                   |
| 22 | Lysine (Lys)                | 1.46 (m), 1.715 (m), 1.846 (m), 3.027 (t), 3.658 (t)                               | 2, 2, 2, 2, 1       |
| 23 | Malate (Mal)                | 2.36 (dd), 2.66 (dd), 4.295 (dd)                                                   | 1, 1, 1             |
| 24 | Methionine (Met)            | 2.135 (m), 2.638 (t), 3.85 (t)                                                     | 5, 2, 1             |
| 25 | Phosphocholine (PC)         | 3.238 (s), 3.58 (m), 4.16 (m)                                                      | 9, 2, 2             |
| 26 | Phenylalanine (Phe)         | 2.84 (m), 3.117 (m), 3.983 (m), 7.327 (d), 7.372 (m), 7.416 (m)                    | 1, 1, 1, 2, 1, 2    |
| 27 | Proline (Pro)               | 2.001 (m), 2.080 (m), 2.345 (m), 3.345 (m), 3.427 (m), 4.137 (m)                   | 2, 2, 1, 1, 1       |
| 28 | Pyruvate (Pyr)              | 2.361 (s)                                                                          | 3                   |
| 29 | Serine (Ser)                | 3.84 (m), 3.971 (m)                                                                | 1, 2                |
| 30 | Threonine (Thr)             | 1.316 (d), 3.574 (d), 4.247 (m)                                                    | 3, 1, 1             |
| 31 | Tryptophan (Trp)            | 3.299 (q), 3.48 (q), 4.037 (m), 7.19 (m), 7.271 (m), 7.30 (s), 7.54 (d), 7.729 (d) | 1, 1, 1, 1, 1, 1, 1 |
| 32 | Tyrosine (Tyr)              | 3.04 (q), 3.19 (q), 3.93 (q), 6.893 (d), 7.187 (d)                                 | 1, 1, 1, 2, 2       |
| 33 | Uracil (Ura)                | 6.18 (d), 7.547 (d)                                                                | 1, 1                |
| 34 | Uridine (Urd)               | 4.236 (t), 4.348 (t), 5.904 (d), 7.847 (d)                                         | 1, 1, 3, 2          |
| 35 | Valine (Val)                | 0.973 (d), 1.023 (d), 2.254 (m), 3.602 (d)                                         | 3, 3, 1, 1          |

**Table S2.** Comparison between absolute concentrations estimated with diffusion/ERETIC method and composition of 15 metabolites in perfused cell culture medium.

| Metabolite | Diffusion/ERETIC [mM] | Medium [mM] |
|------------|-----------------------|-------------|
| Ala        | 0.29                  | 0.1         |
| Arg        | 0.52                  | 0.6         |
| Glc        | 5.59                  | 5.55        |
| Glu        | 0.15                  | 0.1         |

|     |      |      |
|-----|------|------|
| Gln | 1.75 | 1.95 |
| His | 0.14 | 0.2  |
| Ile | 0.36 | 0.4  |
| Leu | 0.35 | 0.4  |
| Lys | 0.37 | 0.4  |
| Phe | 0.23 | 0.19 |
| Pro | 0.22 | 0.1  |
| Pyr | 0.53 | 0.98 |
| Tyr | 0.17 | 0.2  |
| Urd | 0.08 | 0.19 |
| Val | 0.37 | 0.39 |

**Table S3.** Estimated intra- and extracellular absolute concentrations of 19 metabolites in three different perfusion cell culture medium conditions (High AA medium (n=1, for method validation only); metabolic PBS supplied with glucose (Glc), glutamine (Gln), and pyruvate (Pyr) (n=1, for method validation only); normal cell culture medium (n=6)).

| Metabolite | High AA medium    |               |      | Glc, Gln, Pyr<br>(buffered solution) |               |      | Normal cell culture<br>medium |               |      |
|------------|-------------------|---------------|------|--------------------------------------|---------------|------|-------------------------------|---------------|------|
|            | NMR conc.         |               |      | NMR conc.                            |               |      | NMR conc.                     |               |      |
|            | Estimation Medium |               |      | Estimation Medium                    |               |      | Estimation Medium             |               |      |
|            | Extra<br>[mM]     | Intra<br>[mM] | [mM] | Extra<br>[mM]                        | Intra<br>[mM] | [mM] | Extra<br>[mM]                 | Intra<br>[mM] | [mM] |
| Ala        | 0.33              | 0.82          | -    | 0.03                                 | 0.29          | -    | 0.24 ± 0.04                   | 1.1 ± 0.4     | 0.1  |
| Arg        | 0.85              | 13.0          | 0.5  | 0                                    | 0.10          | -    | 0.68 ± 0.14                   | 5.9 ± 4.4     | 0.6  |
| Cho        | 0.08              | 5.5           | -    | 0.08                                 | 2.3           | -    | 0.11 ± 0.02                   | 1.9 ± 0.1     | -    |
| GPC        | 0.10              | 1.5           | -    | 0.08                                 | 1.5           | -    | 0.11 ± 0.02                   | 0.75 ± 0.38   | -    |
| Glc        | 4.7               | 44.1          | 5.55 | 5.1                                  | 15.5          | 5.55 | 5.1 ± 0.7                     | 24.3 ± 7.7    | 5.55 |
| Glu        | 0.11              | 11.9          | -    | 0.11                                 | 7.1           | -    | 0.16 ± 0.05                   | 12.55 ± 3.3   | 0.1  |
| Gln        | 1.6               | 9.6           | 1.95 | 1.5                                  | 13.0          | 1.95 | 1.2 ± 0.2                     | 14.0 ± 6.4    | 1.95 |
| His        | 0.18              | 1.7           | 0.3  | 0                                    | 0             | -    | 0.11 ± 0.03                   | 1.2 ± 1.0     | 0.2  |
| Ile        | 0.65              | 5.2           | 0.8  | 0                                    | 0.29          | -    | 0.31 ± 0.08                   | 3.0 ± 2.3     | 0.4  |
| Lac        | 0.99              | 26.2          | -    | 0.23                                 | 13.4          | -    | 1.2 ± 0.8                     | 16.5 ± 4.4    | -    |
| Leu        | 0.64              | 4.7           | 0.8  | 0                                    | 1.1           | -    | 0.33 ± 0.05                   | 1.6 ± 0.7     | 0.4  |
| Lys        | 0.69              | 3.5           | 1.0  | 0.11                                 | 1.5           | -    | 0.32 ± 0.07                   | 3.9 ± 2.9     | 0.4  |
| PC         | 0.18              | 0.95          | -    | 0.16                                 | 0.81          | -    | 0.21 ± 0.04                   | 1.6 ± 0.6     | -    |
| Phe        | 0.34              | 4.5           | 0.4  | 0                                    | 0.03          | -    | 0.18 ± 0.04                   | 1.3 ± 0.6     | 0.19 |
| Pro        | 0.55              | 20.6          | -    | 0.06                                 | 5.8           | -    | 0.26 ± 0.08                   | 13.7 ± 3.0    | 0.1  |
| Pyr        | 0.59              | 4.4           | 0.98 | 0.45                                 | 3.4           | 0.98 | 0.51 ± 0.02                   | 3.0 ± 1.2     | 0.98 |
| Tyr        | 0.32              | 1.0           | 0.6  | 0                                    | 0.09          | -    | 0.14 ± 0.02                   | 0.9 ± 0.55    | 0.2  |
| Urd        | 0.07              | 0.89          | -    | 0                                    | 0             | -    | 0.07 ± 0.02                   | 0.23 ± 0.14   | 0.19 |
| Val        | 0.68              | 1.5           | 0.8  | 0                                    | 0.02          | -    | 0.4 ± 0.14                    | 2.5 ± 1.4     | 0.39 |
